# Supplementary material for: Electric field-assisted MnO2 nanomaterials for rapid capture and in situ delivery of circulating tumour cells
Source: Royal Society of Chemistry journal article supplement (doi:10.1039/d2nr01371a), 2022-01-01
Supplement: d2nr01371a3.pdf [file d2nr01371a3.pdf]

## Supporting information

### Electric field-assisted MnO<sub>2</sub> nanomaterials for rapid capture and in-situ delivery of circulating tumour cells

*Juan Li, Yu Xia, Fuling Zhou, Rongxiang He\*, Bolei Chen \* and Shishang Guo\**

Prof. S. S. Guo and J. Li, Y. Xia  
Key Laboratory of Artificial Micro/Nano-Structures, Ministry of Education,  
School of Physics and Technology, Wuhan University,  
Wuhan, 430072, China.  
Email address: gssyhx@whu.edu.cn (Shishang Guo)

Dr. B. L. Chen  
Hubei Key Laboratory of Environmental and Health Effects of Persistent Toxic  
Substances,  
School of Environment and Health, Jiangnan University,  
Wuhan, 430056, China.  
Email address: bl\_chen@jhun.edu.cn

Dr. R. X. He  
Institute for Interdisciplinary Research & Key Laboratory of Optoelectronic Chemical  
Materials and Devices of Ministry of Education,  
College of Photoelectric Materials and Technology, Jiangnan University,  
Wuhan, 430056, China.  
Email address: herx@jhun.edu.cn

Prof. F. L. Zhou  
Department of Hematology,  
Zhongnan Hospital of Wuhan University,  
Wuhan, 430072, China.

J. Li and Y. Xia contributed equally to this work.

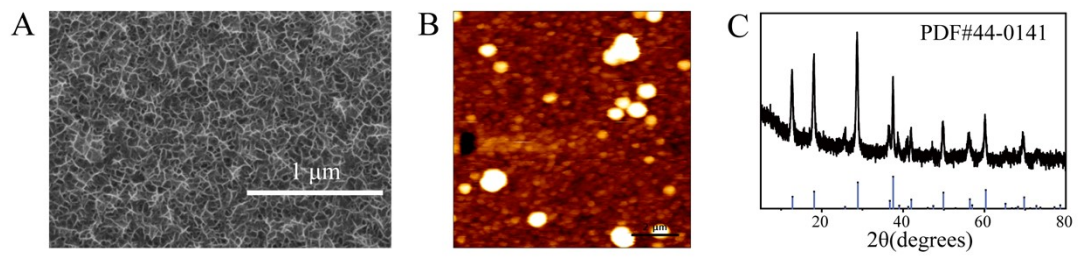

**Figure S1.** SEM image (A), AFM data (B), and XRD patterns (C) of the MnO<sub>2</sub> substrate.

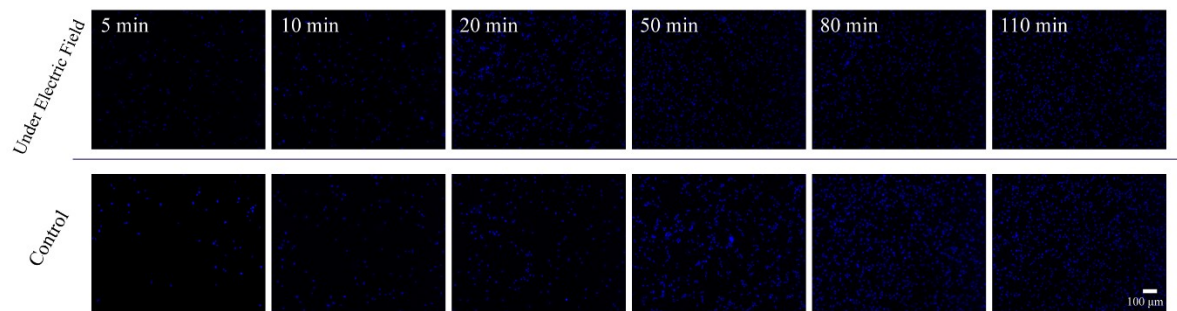

**Figure S2.** A representative group of sequential time snapshots (5, 10, 20, 50, 80, and 110 min) of fluorescence images when the MCF-7 cells were captured under two different conditions: apply accelerate electric field and only rely on gravity. Scale bar =100  $\mu\text{m}$ .

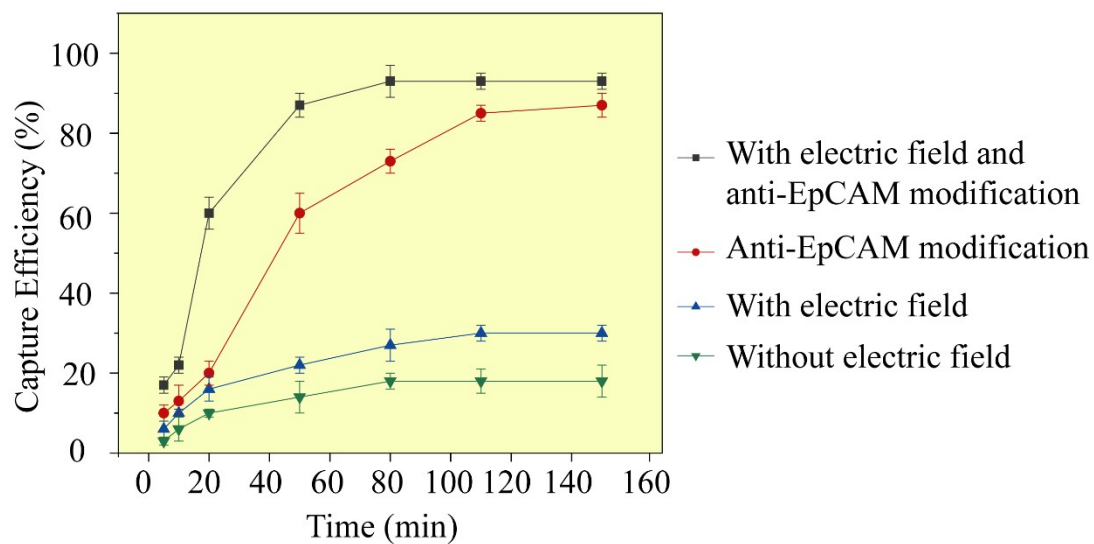

**Figure S3.** The cell-capture efficiencies of MCF-7 cells on the MnO<sub>2</sub> substrate under four different conditions: modified or not, apply accelerate electric field or not. Cell capture efficiency is defined as the ratio of attached cells to the number of total loaded cells.

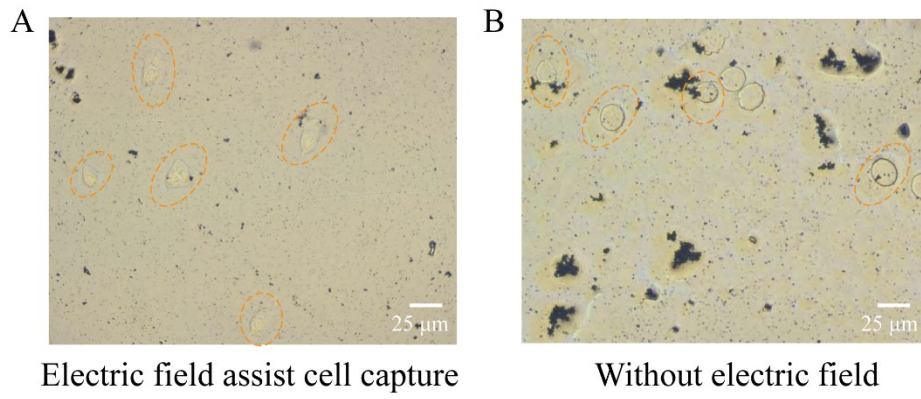

**Figure S4.** Bright field images of captured cells with and without electric field.

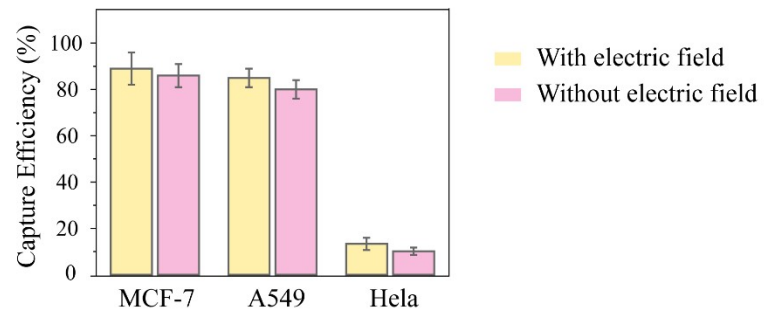

**Figure S5.** Quantitative capture efficiency of three different cancer cell (anti-EpCAM positive cells: MCF-7, A549; anti-EpCAM negative cells: HeLa) under electric field or not.

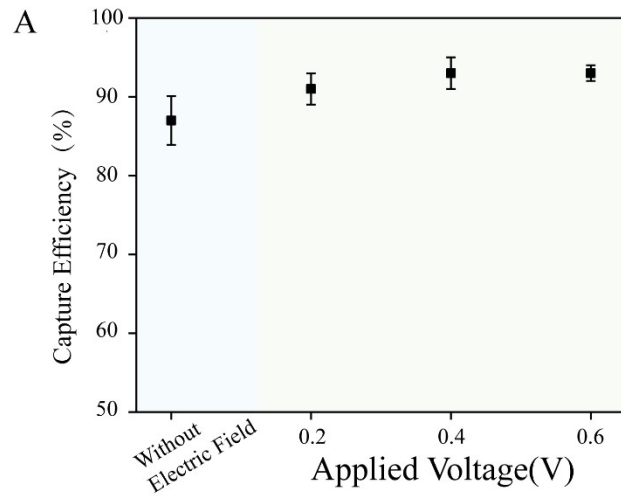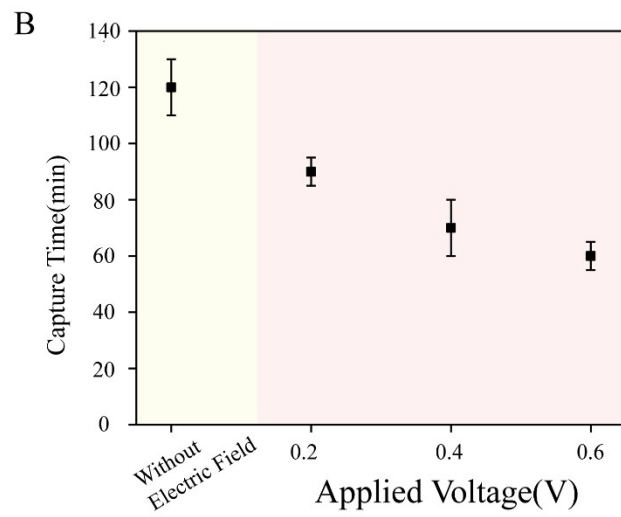

**Figure S6.** (A) Cell capture efficiency under different electric field. (B) Cell capture time under different electric field.

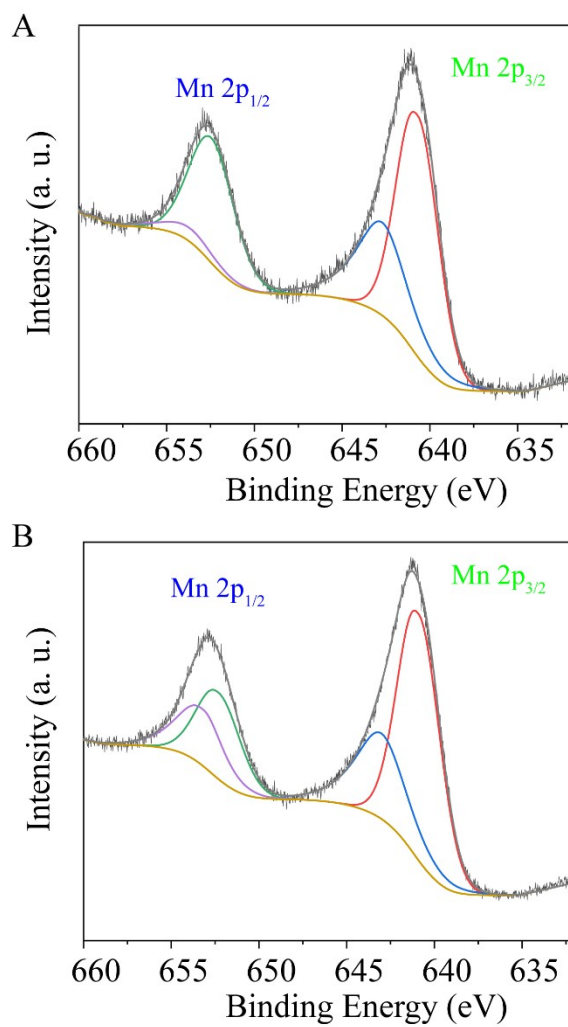

**Figure S7.** XPS spectrum of MnO<sub>2</sub> nanofilm before (A) and after (B) the surface dissolution reaction.



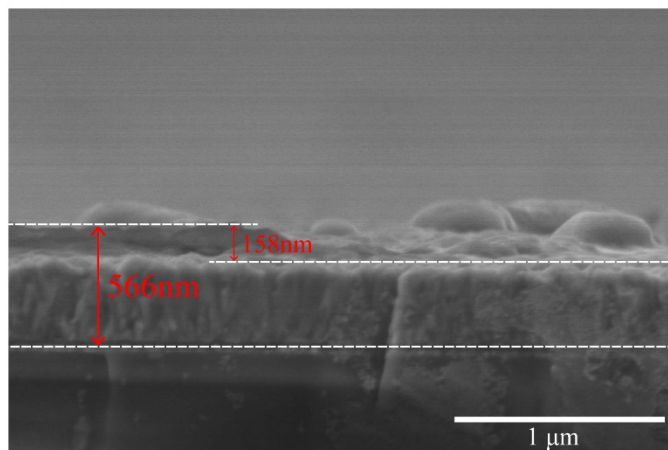

**Figure S8.** SEM image of the cross section. Before dissolution reaction (left), after the reaction (right). Scale bar =1  $\mu\text{m}$ .

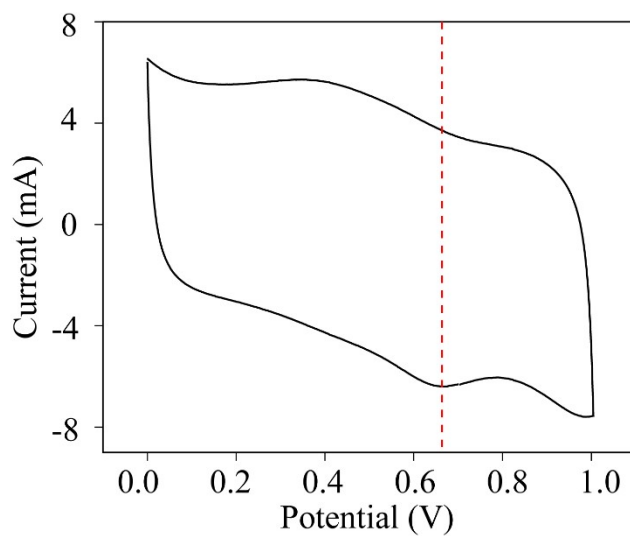

**Figure S9.** The CV curve at scan rate of 10 mV/s of MnO<sub>2</sub> substrate at a voltage window of 0.0-1.0 V in 1 × PBS solution. The working electrode is a MnO<sub>2</sub> substrate., the counter electrode is FTO, the reference electrode is a Hg electrode.

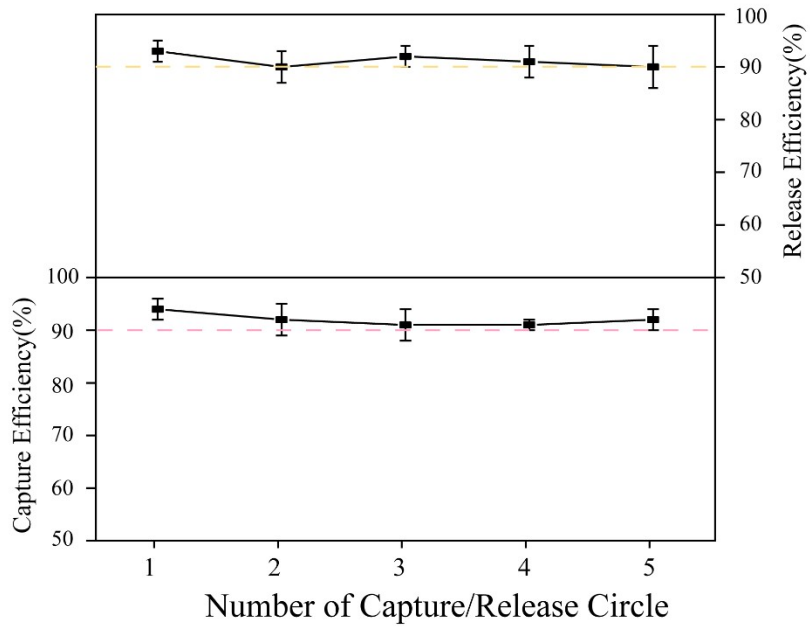

**Figure S10.** Variation in cell capture and release efficiencies after repeated antibody modifications using the same  $\text{MnO}_2$  substrate.

**Table S1.** Comparison of the proposed cell release method with other methods.

| Release Method             | Release Time     | Ref   |
|----------------------------|------------------|-------|
| Chemical treatment (acid ) | More than 10 min | 1-4   |
| Chemical reagent           | About 20 min     | 5-8   |
| Heat                       | About 10 min     | 9-10  |
| Electrochemistry           | 30s-30 min       | 11-13 |
| This method                | 8 s              |       |

**Table S2.** Comparison of the proposed cell capture method with other methods.

| Capture Method          | Capture Time      | Ref         |
|-------------------------|-------------------|-------------|
| Immunomagnetic beads    | More than 80 min  | 14-16       |
| Nanomaterials           | More than 90 min  | 6-7, 10, 17 |
| Microfluidic device     | More than 120 min | 18-21       |
| Gradient centrifugation | About 120 min     | 22          |
| method                  | About 70 min      |             |

**Table S3** Quantification of CTCs per mL of 20 patients and 6 healthy volunteers blood samples. (The cells purity was defined as the ratio of captured CTCs against the total captured cells.)

| Blood Species          | Sample No. | Gender(F/M) | Age | CTC count(1 mL whole blood) | Purity (%) |
|------------------------|------------|-------------|-----|-----------------------------|------------|
| Lung cancer patients   | 1          | F           | 65  | 4                           | 50         |
|                        | 2          | M           | 59  | 2                           | 14.3       |
|                        | 3          | M           | 69  | 11                          | 55         |
|                        | 4          | M           | 55  | 3                           | 20         |
|                        | 5          | F           | 58  | 8                           | 53.3       |
|                        | 6          | F           | 61  | 5                           | 62.5       |
|                        | 7          | F           | 60  | 11                          | 64.7       |
|                        | 8          | M           | 52  | 13                          | 72.2       |
|                        | 9          | M           | 56  | 2                           | 66.7       |
|                        | 10         | F           | 49  | 10                          | 55.5       |
| Breast cancer patients | 11         | F           | 45  | 8                           | 47         |
|                        | 12         | F           | 49  | 2                           | 50         |
|                        | 13         | F           | 56  | 12                          | 42.9       |
|                        | 14         | F           | 51  | 11                          | 55         |
|                        | 15         | F           | 64  | 15                          | 78.9       |
|                        | 16         | F           | 39  | 5                           | 25         |
|                        | 17         | F           | 48  | 12                          | 50         |
|                        | 18         | F           | 41  | 2                           | 66.7       |
|                        | 19         | F           | 52  | 7                           | 35         |
|                        | 20         | F           | 43  | 10                          | 62.5       |
| Healthy volunteers     | 1          | M           | 27  | 0                           | 0          |
|                        | 2          | F           | 29  | 0                           | 0          |
|                        | 3          | F           | 45  | 0                           | 0          |
|                        | 4          | M           | 38  | 0                           | 0          |
|                        | 5          | F           | 63  | 0                           | 0          |
|                        | 6          | M           | 58  | 0                           | 0          |

## Reference

1. Cui, H.; Liu, Q.; Li, R.; Wei, X.; Sun, Y.; Wang, Z.; Zhang, L.; Zhao, X.-Z.; Hua, B.; Guo, S.-S., *Nanoscale* **2020**, *12* (3), 1455-1463, 10.1039/C9NR07349C.
2. Li, R.; Chen, F. F.; Liu, H. Q.; Wang, Z. X.; Zhang, Z. T.; Wang, Y.; Cui, H.; Liu, W.; Zhao, X. Z.; Sun, Z. J.; Guo, S. S., *ACS Applied Materials & Interfaces* **2018**, *10* (19), 16327-16334, 10.1021/acsami.8b04683.
3. Liu, Y.; Wang, X.; Zhou, Y.; Yang, G.; Hou, J.; Zhou, S., *Nanoscale* **2021**, *13* (40), 16923-16931, 10.1039/D1NR04112F.
4. Xu, L.; Li, R.; Wang, Z.; Cui, H.; Li, W.; Yu, M.; Guo, S.-S.; Zhao, X.-Z., *Nanotechnology* **2020**, *31* (49), 495102, 10.1088/1361-6528/abb48b.
5. Guo, S.; Xu, J.; Xie, M.; Huang, W.; Yuan, E.; Liu, Y.; Fan, L.; Cheng, S.; Liu, S.; Wang, F.; Yuan, B.; Dong, W.; Zhang, X.; Huang, W.; Zhou, X., *ACS Applied Materials & Interfaces* **2016**, *8* (25), 15917-15925, 10.1021/acsami.6b04002.
6. Zhou, L.; Zhang, A.; Mo, J.; Xiu, S.; Hang, T.; Feng, J.; Wen, R.; Liu, D.; Yang, C.; Feng, Y.; Huang, Y.; Hu, N.; Xie, X.; He, G., *Applied Materials Today* **2020**, *19*, 100617, <https://doi.org/10.1016/j.apmt.2020.100617>.
7. Dou, X.; Li, P.; Jiang, S.; Bayat, H.; Schönherr, H., *ACS Applied Materials & Interfaces* **2017**, *9* (10), 8508-8518, 10.1021/acsami.6b16202.
8. Li, W.; Li, R.; Huang, B.; Wang, Z.; Sun, Y.; Wei, X.; Heng, C.; Liu, W.; Yu, M.; Guo, S.-S.; Zhao, X.-Z., *Nanotechnology* **2019**, *30* (33), 335101, 10.1088/1361-6528/ab176c.
9. Li, R.; Cui, H.; Zhang, Z.; Zhang, L.; Wang, Y.; Wei, Y.; Zhou, F.; Liu, W.; Dong, W.; Zhao, X.; Guo, S., *ACS Applied Bio Materials* **2018**, *1* (3), 910-916, 10.1021/acsabm.8b00333.
10. Cheng, S.-B.; Xie, M.; Chen, Y.; Xiong, J.; Liu, Y.; Chen, Z.; Guo, S.; Shu, Y.; Wang, M.; Yuan, B.-F.; Dong, W.-G.; Huang, W.-H., *Analytical Chemistry* **2017**, *89* (15), 7924-7932, 10.1021/acs.analchem.7b00905.
11. Zhai, T.-T.; Ye, D.; Zhang, Q.-W.; Wu, Z.-Q.; Xia, X.-H., *ACS Applied Materials & Interfaces* **2017**, *9* (40), 34706-34714, 10.1021/acsami.7b11107.
12. Yan, S.; Chen, P.; Zeng, X.; Zhang, X.; Li, Y.; Xia, Y.; Wang, J.; Dai, X.; Feng, X.; Du, W.; Liu, B.-F., *Analytical Chemistry* **2017**, *89* (22), 12039-12044, 10.1021/acs.analchem.7b02469.
13. Cheng, S.-B.; Chen, M.-M.; Wang, Y.-K.; Sun, Z.-H.; Qin, Y.; Tian, S.; Dong, W.-G.; Xie, M.; Huang, W.-H., *Analytical Chemistry* **2021**, *93* (18), 7102-7109, 10.1021/acs.analchem.1c00785.
14. Meng, Q.-F.; Cheng, Y.-X.; Huang, Q.; Zan, M.; Xie, W.; Sun, Y.; Li, R.; Wei, X.; Guo, S.-S.; Zhao, X.-Z.; Rao, L.; Liu, W., *ACS Applied Materials & Interfaces* **2019**, *11* (32), 28732-28739, 10.1021/acsami.9b10318.
15. Wen, C.-Y.; Wu, L.-L.; Zhang, Z.-L.; Liu, Y.-L.; Wei, S.-Z.; Hu, J.; Tang, M.; Sun, E.-Z.; Gong, Y.-P.; Yu, J.; Pang, D.-W., *ACS Nano* **2014**, *8* (1), 941-949, 10.1021/nn405744f.
16. Cui, H.; Li, R.; Du, J.; Meng, Q.-F.; Wang, Y.; Wang, Z.-X.; Chen, F.-F.; Dong, W.-F.; Cao, J.; Yang, L.-L.; Guo, S.-S., *Talanta* **2019**, *202*, 230-236, <https://doi.org/10.1016/j.talanta.2019.05.001>.
17. Chen, C.; Wang, Z.; Zhao, Y.; Cao, Y.; Ding, P.; Liu, H.; Su, N.; Pei, R., *Analytical Methods* **2019**, *11* (44), 5718-5723, 10.1039/C9AY02090J.
18. Park, E. S.; Jin, C.; Guo, Q.; Ang, R. R.; Duffy, S. P.; Matthews, K.; Azad, A.; Abdi, H.; Todenhöfer, T.; Bazov, J.; Chi, K. N.; Black, P. C.; Ma, H., *Small* **2016**, *12* (14), 1909-1919,

<https://doi.org/10.1002/sml.201503639>.

19. Jiang, X.; Wong, K. H. K.; Khankhel, A. H.; Zeinali, M.; Reategui, E.; Phillips, M. J.; Luo, X.; Aceto, N.; Fachin, F.; Hoang, A. N.; Kim, W.; Jensen, A. E.; Sequist, L. V.; Maheswaran, S.; Haber, D. A.; Stott, S. L.; Toner, M., *Lab on a Chip* **2017**, *17* (20), 3498-3503, 10.1039/C7LC00654C.
20. Hakim, M.; Khorasheh, F.; Alemzadeh, I.; Vossoughi, M., *Analytica Chimica Acta* **2021**, *1186*, 339115, <https://doi.org/10.1016/j.aca.2021.339115>.
21. Park, J.; Park, S.; Hyun, K. A.; Jung, H.-I., *Lab on a Chip* **2021**, *21* (18), 3483-3497, 10.1039/D1LC00433F.
22. Park, J.-M.; Lee, J.-Y.; Lee, J.-G.; Jeong, H.; Oh, J.-M.; Kim, Y. J.; Park, D.; Kim, M. S.; Lee, H. J.; Oh, J. H.; Lee, S. S.; Lee, W.-Y.; Huh, N., *Analytical Chemistry* **2012**, *84* (17), 7400-7407, 10.1021/ac3011704.
